# Supplementary material for: The levels of serine proteases in colon tissue interstitial fluid and serum serve as an indicator of colorectal cancer progression
Source: PubMed Central journal article supplement (PMC5078036; doi:10.18632/oncotarget.8693), 2016-04-11
Supplement: oncotarget-07-32592-s001.pdf [file oncotarget-07-32592-s001.pdf]

## The levels of serine proteases in colon tissue interstitial fluid and serum serve as an indicator of colorectal cancer progression

### SUPPLEMENTARY FIGURES AND TABLES

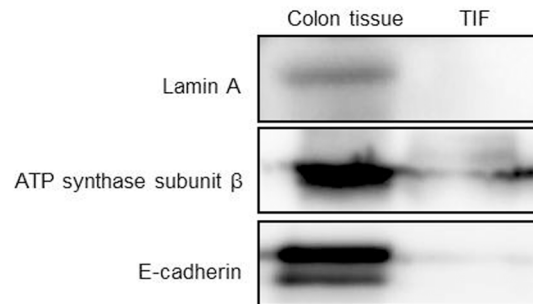

**Supplementary Figure S1: Quality evaluation of pooled mouse colon TIF using Western blotting.** Lamin A, ATP synthase subunit  $\beta$ , and E-cadherin were used as nuclear, mitochondrial, and plasma membrane markers, respectively. The TIF sample was mixed from 12  $Apc^{Min/+}$  mice, three at each time point.

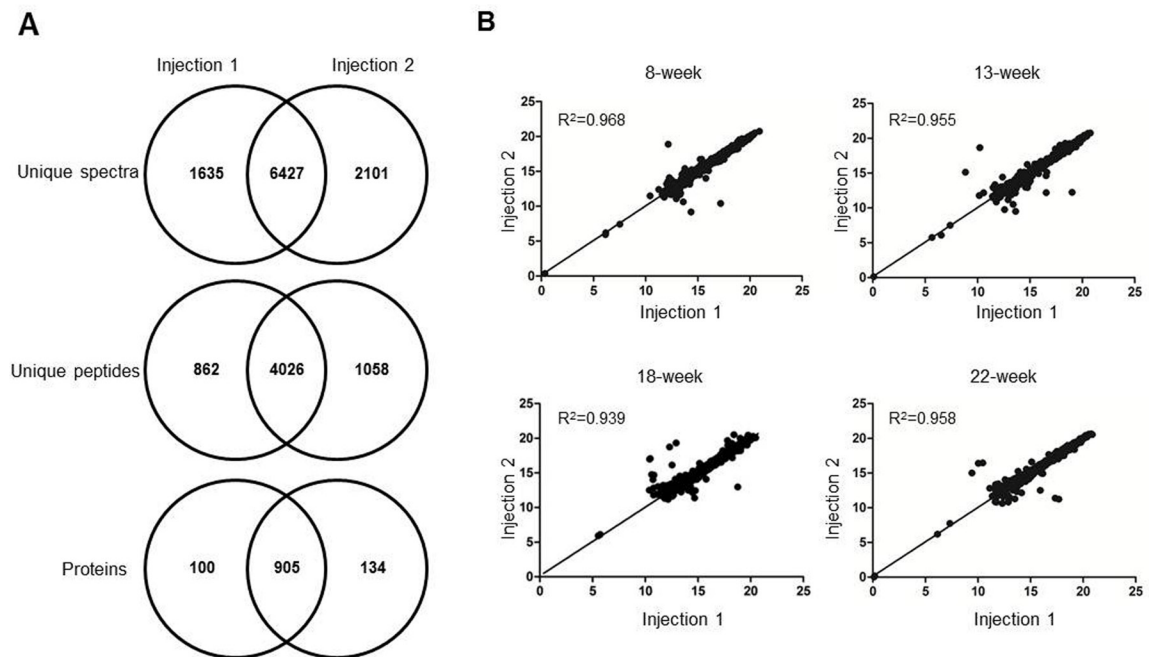

**Supplementary Figure S2: The qualitative and quantitative reproducibility of technical duplicated LC-MS/MS data.** **A.** Overlaps of unique spectra, peptides and proteins identified in duplicate. **B.** Correlation analysis of normalized tag intensities in duplicate using the Pearson method. The square of the correlation coefficient ( $R^2$ ) is listed.

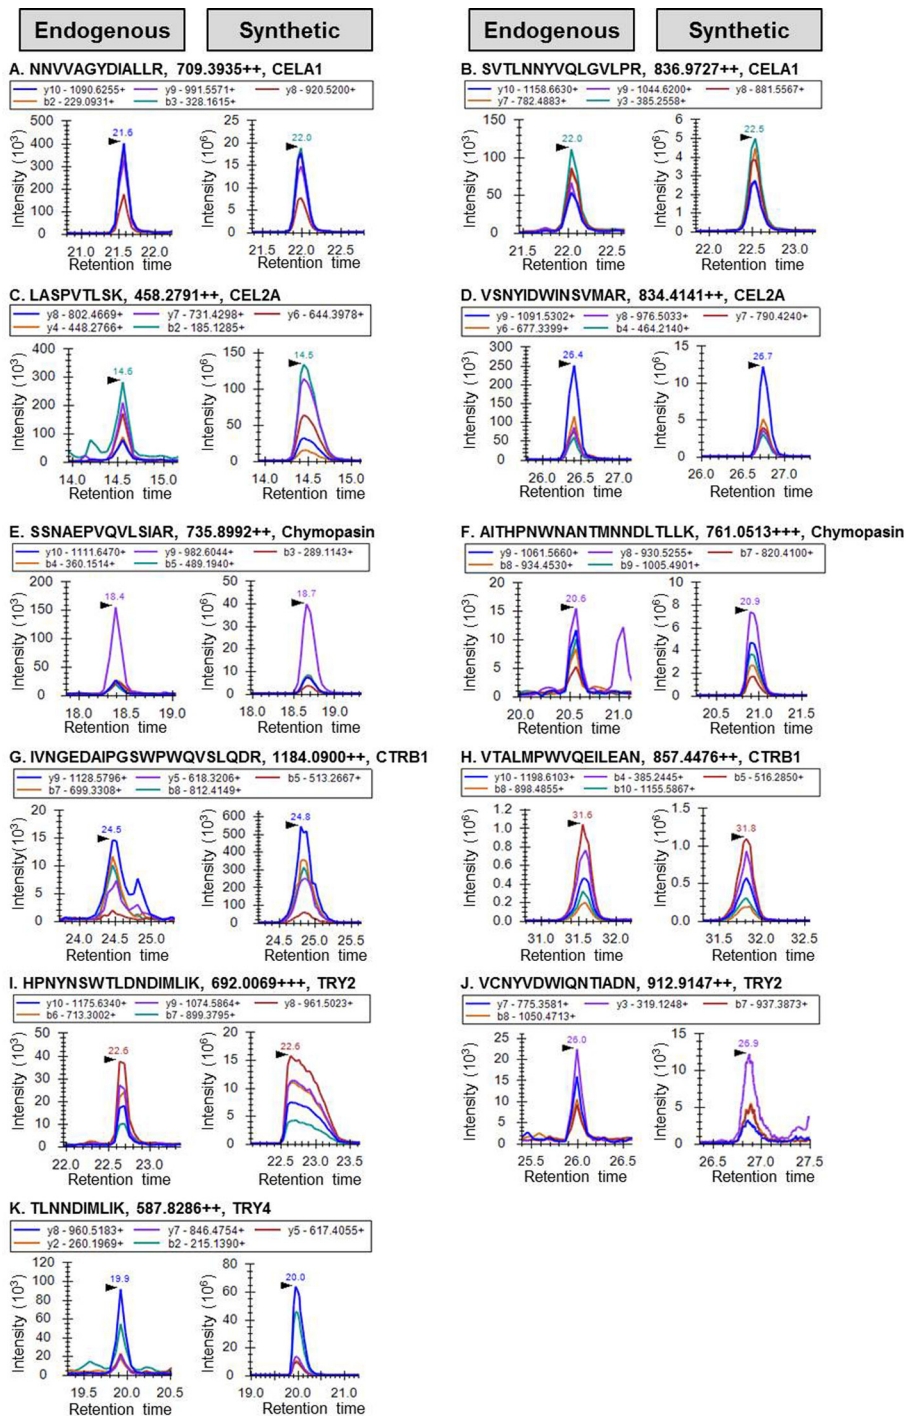

**Supplementary Figure S3: Validation of the MRM signals in mouse TIFs and sera.** For each peptide, the left panel shows the endogenous peptide detected in mouse samples, and the right panel shows the corresponding synthetic peptide as a validation standard to determine retention time and overlays.

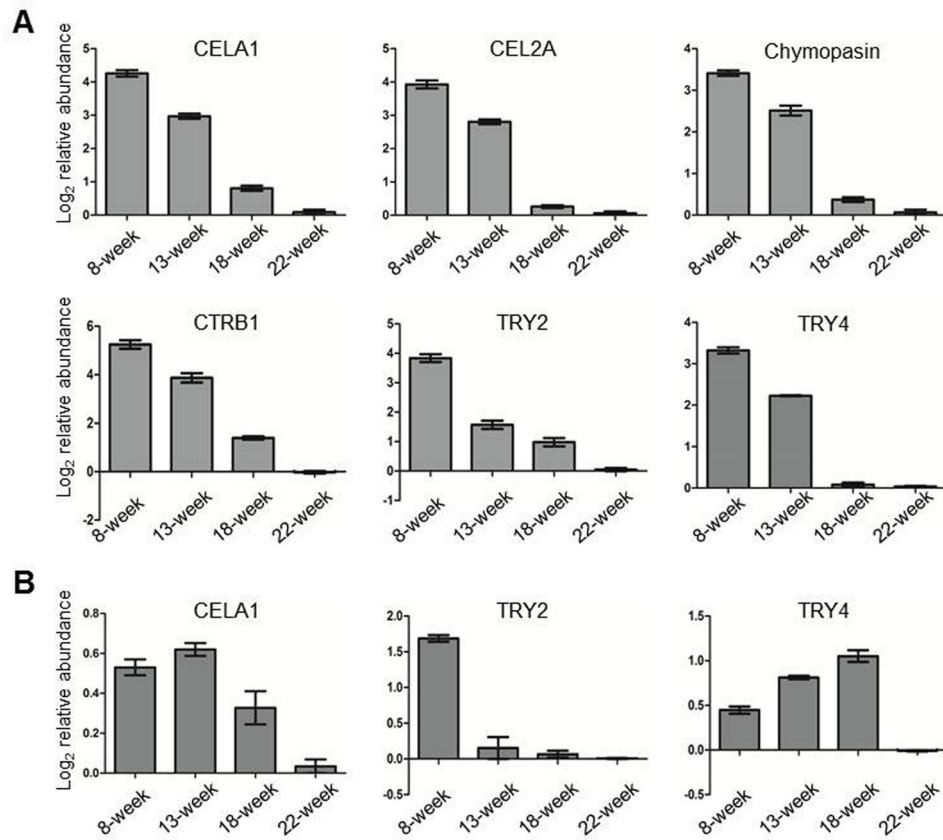

**Supplementary Figure S4: The relative protein levels of the detectable serine proteases in pooled TIF (A) and serum (B) samples from WT mice (n=3/time point) measured using MRM. The protein peak areas of 22-week-old TIF and serum samples were used as the references.**

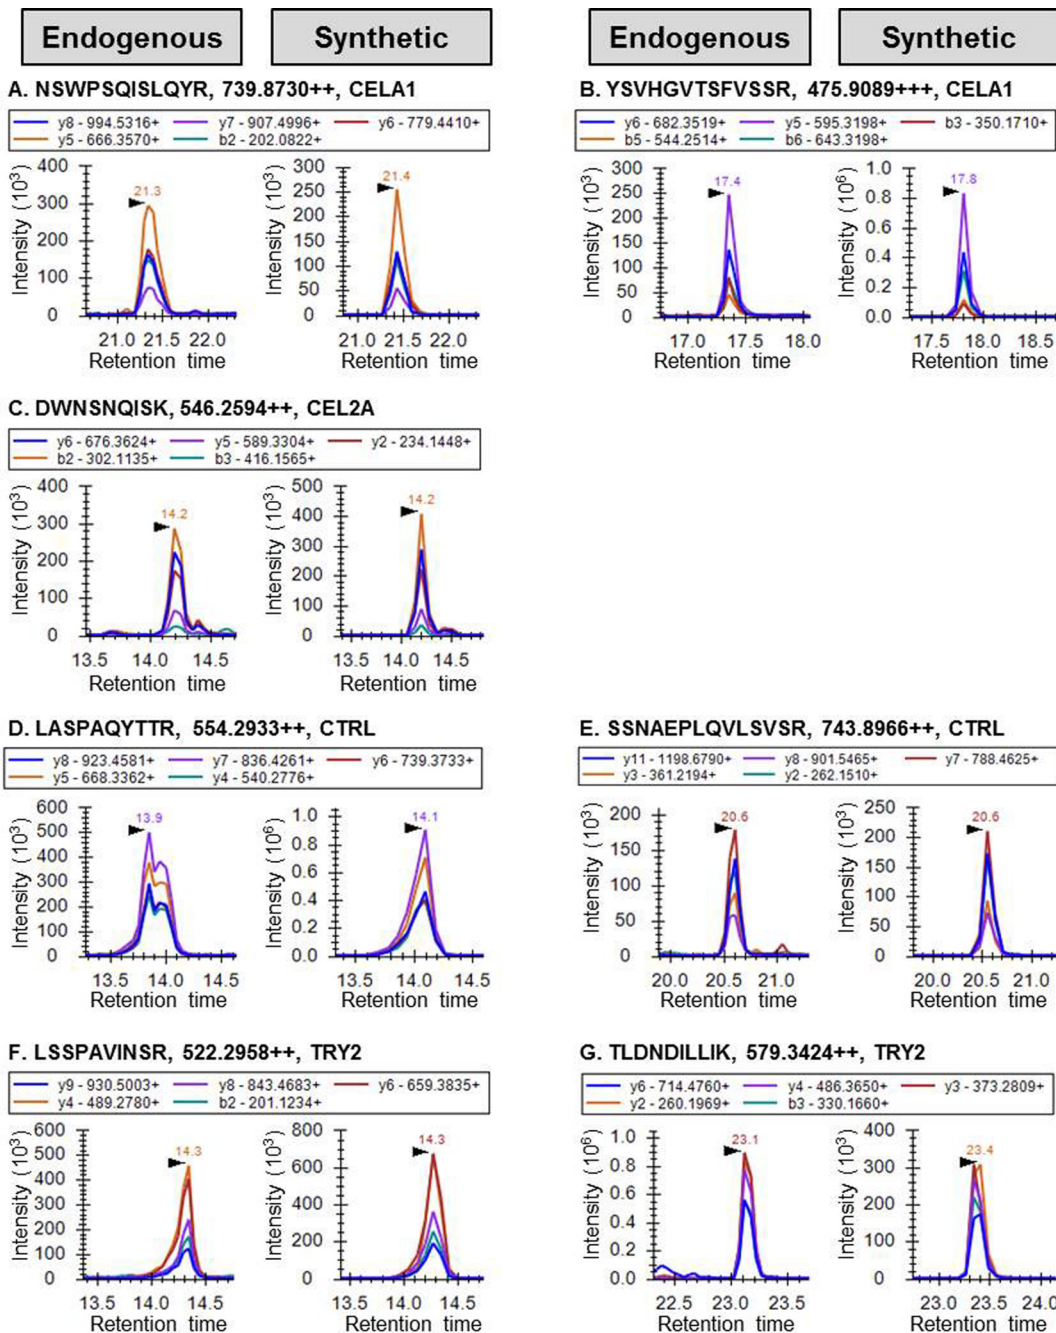

**Supplementary Figure S5: Validation of the MRM signals in human sera.** For each peptide, the left panel shows the endogenous peptide detected in serum, and the right panel shows the corresponding synthetic peptide as a validation standard to determine retention time and overlays.

Supplementary Table S1: Number and size of colorectal tumors in individual mice at four time points

| Age of mice | Mouse ID | Number of tumors | Average number<br>(Mean±SE) | Size of tumors<br>(mm) | Average size<br>(Mean±SE) |
|-------------|----------|------------------|-----------------------------|------------------------|---------------------------|
| 8-week      | 1        | 0                | 0                           | 0                      | 0                         |
|             | 2        | 0                |                             |                        |                           |
|             | 3        | 0                |                             |                        |                           |
|             | 4        | 0                |                             |                        |                           |
|             | 5        | 0                |                             |                        |                           |
|             | 6        | 0                |                             |                        |                           |
|             | 7        | 0                |                             |                        |                           |
|             | 8        | 0                |                             |                        |                           |
|             | 9        | 0                |                             |                        |                           |
| 13-week     | 1        | 1                | 1.14±0.34                   | 1.3                    | 1.54±0.11                 |
|             | 2        | 1                |                             | 1.8                    |                           |
|             | 3        | 1                |                             | 2                      |                           |
|             | 4        | 1                |                             | 1.6                    |                           |
|             | 5        | 3                |                             | 1.1, 1.6, 1.2          |                           |
|             | 6        | 1                |                             | 1.7                    |                           |
|             | 7        | 0                |                             | 0                      |                           |
| 18-week     | 1        | 1                | 1.50±0.22                   | 3.1                    | 2.98±0.12                 |
|             | 2        | 2                |                             | 3.5, 2.4               |                           |
|             | 3        | 2                |                             | 2.8, 3.0               |                           |
|             | 4        | 2                |                             | 2.6, 3.4               |                           |
|             | 5        | 1                |                             | 3.2                    |                           |
|             | 6        | 1                |                             | 2.8                    |                           |
| 22-week     | 1        | 3                | 2.50±0.33                   | 4.7, 3.9, 5.0          | 4.64±0.16                 |
|             | 2        | 3                |                             | 4.2, 4.5, 4.8          |                           |
|             | 3        | 2                |                             | 4.0, 4.3               |                           |
|             | 4        | 3                |                             | 5.3, 6.1, 4.3          |                           |
|             | 5        | 4                |                             | 6.2, 4.5, 4.7, 3.9     |                           |
|             | 6        | 2                |                             | 4.2, 4.0               |                           |
|             | 7        | 2                |                             | 3.8, 5.8               |                           |
|             | 8        | 1                |                             | 4.5                    |                           |

**Supplementary Table S2: Information for 1174 identified proteins**

See Supplementary File 1

Supplementary Table S3: Peptide parameters of the six serine proteases for MRM in mouse TIFs and sera

| Protein name | Unique peptide        | Charge | Q1       | Q3                                                       | Fragment         |
|--------------|-----------------------|--------|----------|----------------------------------------------------------|------------------|
| CELA1        | NNVVAGYDIALLR         | 2+     | 709.3935 | 1090.6255, 991.5571,<br>920.5200, 229.0931,<br>328.1615  | y10,y9,y8,b2,b3  |
|              | SVTLNNYVQLGVLPR       | 2+     | 836.9727 | 1158.6630, 1044.6200,<br>881.5567, 782.4883,<br>385.2558 | y10,y9,y8,y7,y3  |
| CEL2A        | LASPVTLSK             | 2+     | 458.2791 | 802.4669, 731.4298,<br>644.3978, 448.2766,<br>185.1285   | y8,y7,y6,y4,b2   |
|              | VSNYIDWINSVMAR        | 2+     | 834.4141 | 1091.5302, 976.5033,<br>790.4240, 677.3399,<br>464.2140  | y9,y8,y7,y6,b4   |
| Chymopasin   | SSNAEPVQVLSIAR        | 2+     | 735.8992 | 1111.6470, 982.6044,<br>289.1143, 360.1514,<br>489.1940  | y10,y9,b3,b4,b5  |
|              | AITHPNWNANTMNNDLTLLK  | 3+     | 761.0513 | 1061.5660, 930.5255,<br>820.4100, 934.4530,<br>1005.4901 | y9,y8,b7,b8,b9   |
| CTRB1        | IVNGEDAIPGSWPWQVSLQDR | 2+     | 1184.09  | 1128.5796, 618.3206,<br>513.2667, 699.3308,<br>812.4149  | y9,y5,b5,b7,b8   |
|              | VTALMPWVQEILEAN       | 2+     | 857.4476 | 1198.6103, 385.2445,<br>516.2850, 898.4855,<br>1155.5867 | y10,b4,b5,b8,b10 |
| TRY2         | HPNYNSWTLDNDIMLIK     | 3+     | 692.0069 | 1175.6340, 1074.5864,<br>961.5023, 713.3002,<br>899.3795 | y10,y9,y8,b6,b7  |
|              | VCNYVDWIQNTIADN       | 2+     | 912.9147 | 775.3581, 319.1248,<br>937.3873, 1050.4713               | y7,y3,b7,b8      |
| TRY4         | TLNNDIMLIK            | 2+     | 587.8286 | 960.5183, 846.4754,<br>617.4055, 260.1969,<br>215.1390   | y8,y7,y5,y2,b2   |



Supplementary Table S4: Peptide parameters of the four serine proteases for MRM in human sera

| Protein name | Unique peptide | Charge | Q1       | Q3                                                      | Fragment            |
|--------------|----------------|--------|----------|---------------------------------------------------------|---------------------|
| CELA1        | NSWPSQISLQYR   | 2+     | 739.873  | 994.5316, 907.4996,<br>779.4410, 666.3570,<br>202.0822  | y8, y7, y6, y5, b2  |
|              | YSVHGVTSFVSSR  | 3+     | 475.9089 | 682.3519, 595.3198,<br>350.1710, 544.2514,<br>643.3198  | y6, y5, b3, b5, b6  |
| CEL2A        | DWNSNQISK      | 2+     | 546.2594 | 676.3624, 589.3304,<br>234.1448, 302.1135,<br>416.1565  | y6, y5, y2, b2, b3  |
| CTRL         | SSNAEPLQVLSVSR | 2+     | 743.8966 | 1198.6790, 901.5465,<br>788.4625, 361.2194,<br>262.1510 | y11, y8, y7, y3, y2 |
|              | LASPAQYTTR     | 2+     | 554.2933 | 923.4581, 836.4261,<br>739.3733, 668.3362,<br>540.2776  | y8.,y7, y6, y5, y4  |
| TRY2         | TLDNDILLIK     | 2+     | 579.3424 | 714.4760, 486.3650,<br>373.2809, 260.1969,<br>330.1660  | y6, y4, y3, y2, b3  |
|              | LSSPAVINSR     | 2+     | 522.2958 | 930.5003, 843.4683,<br>659.3835, 489.2780,<br>201.1234  | y9, y8, y6, y4, b2  |
